# Supplementary material for: Evidence for millennial-scale interactions between Hg cycling and hydroclimate from Lake Bosumtwi, Ghana
Source: Copernicus journal article supplement (doi:10.5194/cp-21-817-2025), 2025-04-17
Supplement: Supplementary file 1 [file cp-21-817-2025-supplement.zip]

## Sheet: MERCURY
Core Section	Depth (m)	Hg (ng g-1)	TOC (wt %)	TIC (wt %)	HgAR (mg m2 kyr)	DBD (g cm3)	Age (ka)
16H-2	47.724	31	2.02213	0.814573		1.1752	96.1922
16H-2	47.324	20	5.52052	0.498121	21.4676	1.1752	95.7542
16H-2	47.124	85	3.07431	1.2557	91.2373	1.1752	95.5353
16H-2	46.924	36	2.15594	1.30109	38.6417	1.1752	95.3163
16H-2	46.724	20	1.73756	0.638682	19.6153	1.0738	95.0973
16H-1	46.521	20	3.1317	0.619487	19.6153	1.0738	94.8751
16H-1	46.321	25	2.29875	1.25573	27.4282	1.2012	94.6561
16H-1	46.121	15	2.45283	1.371	16.4743	1.2012	94.4374
16H-1	45.921	18	2.85531	1.73323	19.7692	1.2012	94.2186
16H-1	45.721	8.6	2.34682	1.08977	9.44528	1.2012	93.9999
16H-1	45.331	16	2.51498	0.819315	17.5726	1.2012	93.5733
16H-1	45.221	10	2.24127	1.14423	10.9829	1.2012	93.453
15H-2	44.903	19	2.42413	1.57256	19.377	1.1154	93.1052
15H-2	44.703	14	3.34841	2.19674	14.2778	1.1154	92.8865
15H-2	44.503	15	2.48621	1.02513	15.2976	1.1154	92.6678
15H-2	44.303	16	3.7066	1.8101	16.3174	1.1154	92.449
15H-2	43.903	26	2.47837	0.396889	26.361	1.1154	92.009
15H-2	43.703	16	4.77429	1.4238	17.3687	1.2012	91.7877
15H-1	43.627	19	4.38729	1.41626	20.6253	1.2012	91.7036
15H-1	43.427	28	1.58505	0.250082	15.4607	0.611	91.4822
15H-1	43.027	13	1.95015	0.274908	7.1782	0.611	91.0396
15H-1	42.827	18	3.43403	1.3874	9.93904	0.611	90.8183
15H-1	42.727	47	1.7557	0.26962	25.9519	0.611	90.7077
15H-1	42.627	19	1.56896	0.14913	10.4912	0.611	90.597
15H-1	42.227	23	1.52512	0.239256	24.7854	1.209	90.1482
14H-2	41.928	24	1.4875	0.527944	25.5137	1.209	89.8082
14H-2	41.788	18	2.21737	0.454054	19.4645	1.2298	89.649
14H-2	41.588	10	1.71938	0.516098	10.8136	1.2298	89.4215
14H-2	41.388	23	1.63059	0.78156	24.8713	1.2298	89.1941
14H-2	40.988	13	3.51407	1.62841	14.0577	1.2298	88.7392
14H-2	40.788	13	2.98346	2.27242	8.91607	0.78	88.5117
14H-1	40.598	39	2.98346	1.98982	26.7482	0.78	88.2956
14H-1	40.398	21	1.11504	1.23886	21.7484	1.1778	88.0682
14H-1	40.198	20	1.11504	0.665431	20.7127	1.1778	87.8407
14H-1	39.798	20	2.00801	0.731427	17.9807	1.1778	87.3167
14H-1	39.598	24	1.5548	0.992844	21.5768	1.1778	87.0547
14H-1	39.398	24	7.63521	3.84793	21.5768	1.1778	86.7927
13H-1	36.992	23	8.30693	4.02102	15.4202	0.9334	83.443
13H-1	36.772	62	3.46045	1.83632	38.5805	0.9334	83.113
13H-1	36.312	16	10.8816	4.86228	9.95627	0.9334	82.423
12H-1	33.56	15	0.716135	0.402204	11.6106	1.6458	76.5716
12H-1	33.232	15	1.06072	0.427798	7.60178	1.6562	75.4996
12H-1	33.032	20	0.922543	0.503808	10.0337	1.638	74.8466
11H-2	32.839	9.7	0.732149	0.527162	4.8589	1.638	74.2155
11H-2	32.639	72	4.22363	0.449418	37.784	1.7134	73.5625
11H-2	32.439	115	11.7389	0.384377	60.2572	1.7134	72.9085
11H-2	32.249	110	10.863	1.45643	57.7302	1.7134	72.2882
11H-2	32.049	69	9.31269	0.281486	36.1543	1.7134	71.6342
11H-2	31.849	67	13.009	0.731199	32.3201	1.7134	70.9239
11H-2	31.449	105	14.238	0.701754	8.38273	0.2912	69.4649
11H-1	31.234	134	9.88585	0.177946	10.6906	0.2912	68.6801
11H-1	31.034	56	7.33468	0.275314	4.47385	0.2912	67.9511
11H-1	30.844	73	11.9388	0.412486	5.824	0.2912	67.2576
11H-1	30.654	78	3.28359	0.612865	6.23189	0.2912	66.5651
11H-1	30.454	57	3.03109	0.679964	4.54751	0.2912	65.8351
11H-1	30.264	29	2.40899	0.44335	2.31698	0.2912	65.1426
11H-1	30.074	31	3.06638	0.826155	7.88334	0.9282	64.4491
10H-2	29.801	27	4.58755	0.459208	12.1826	0.9282	63.8875
10H-2	29.611	37	6.10784	0.698311	17.2559	0.9594	63.4966
10H-2	29.411	26	4.93434	0.4524	12.1258	0.9594	63.0852
10H-2	29.211	26	5.56348	0.388898	12.1258	0.9594	62.6738
10H-2	29.011	34	6.59399	0.434269	15.8568	0.9594	62.2624
10H-2	28.811	72	3.41728	1.6685	33.579	0.9594	61.8509
10H-2	28.611	105	3.99214	0.748576	48.9694	0.9594	61.4395
10H-1	28.411	64	3.87907	0.610031	31.2231	1.0036	61.0281
10H-1	28.221	107	10.2171	0.271525	44.087	0.8476	60.6372
10H-1	28.021	58	5.42175	0.183268	23.8976	0.8476	60.2258
10H-1	27.821	99	9.41042	1.06393	38.7223	0.8476	59.7924
10H-1	27.621	65	12.7896	0.335714	25.4237	0.8476	59.359
10H-1	27.421	97	12.1965	0.326693	37.94	0.8476	58.9256
10H-1	27.221	118	12.3367	0.204163	46.1538	0.8476	58.4922
9H-2	26.774	83	11.0904	0.71066	0.398333	0.0104	57.5235
9H-2	26.674	134	15.652	0.386052	4.50164	0.0728	57.3068
9H-2	26.474	25	5.22882	0.307634	0.839859	0.0728	56.8734
9H-2	26.274	88	2.91959	1.51715	2.9563	0.0728	56.44
9H-2	26.074	71	6.26423	0.787874	2.3852	0.0728	56.0066
9H-2	25.874	74	7.19211	0.989011	2.43028	0.0728	55.5632
9H-2	25.674	63	3.06981	2.52846	2.06902	0.0728	55.1199
9H-1	25.29	20	3.32094	1.48047	5.93494	0.6578	54.2687
9H-1	24.89	60	3.83216	1.01674	9.28947	0.3432	53.382
9H-1	24.49	20	2.82998	1.85179	3.09649	0.3432	52.4953
9H-1	24.09	13	1.16666	1.93923	2.01272	0.3432	51.6086
8H-2	23.081	99	5.8755	0.913495	11.4537	0.2288	49.6132
8H-2	22.881	57	3.01992	0.790456	6.79768	0.2288	49.2295
8H-1	22.281	154	7.60183	0.775518	50.5056	0.6292	48.0784
8H-1	21.881	67	5.92311	0.611668	21.9732	0.6292	47.311
8H-1	21.481	56	12.2849	0.269753	30.2955	0.6292	46.8457
8H-1	21.081	114	10.1953	0.404651	61.673	0.6292	46.3805
7H-2	20.542	70	22.1499	0.294901	15.9615	0.2652	45.7536
7H-2	20.442	171	7.35178	1.87382	28.288	0.1924	45.6373
7H-2	20.242	53	14.8646	1.90661	34.7151	0.7618	45.4047
7H-2	20.042	58	9.43383	1.27798	8.37524	0.4888	44.7277
7H-2	19.242	76	11.5758	3.53228	0	0	41.8267
7H-1	19.037	52	12.8167	1.81615	5.37692	0.4498	40.9349
7H-1	18.837	133	7.86549	1.3678	13.7525	0.4498	40.0649
7H-1	18.637	37	8.08619	0.984015	3.82589	0.4498	39.1949
7H-1	18.437	33	7.12791	1.54552	3.41228	0.4498	38.3249
7H-1	18.037	72	4.4834	1.4125	9.08607	0.4498	36.8992
6H-2	17.824	77	11.2625	0.336366	13.2572	0.4784	36.3074
6H-2	17.424	63	9.66601	0.182849	4.30335	0.1898	35.1959
6H-2	17.224	308	13.203	0.122203	21.0386	0.1898	34.6402
6H-2	17.024	61	7.14163	0.712803	5.03383	0.1898	34.1802
6H-2	16.824	49	8.73004	1.63803	4.04357	0.1898	33.7202
6H-2	16.424	101	15.5027	0.440783	0	0	32.8002
6H-1	15.06	81	7.76464	1.23486	14.9933	0.234	31.0759
6H-1	15.04	52	7.09202	1.21832	9.62534	0.234	31.0506
6H-1	15.03	85	5.89832	1.06179	15.7337	0.234	31.038
6H-1	15.02	34	6.35321	1.88382	6.29349	0.234	31.0253
6H-1	15.01	32	7.99599	1.57519	5.92329	0.234	31.0127
6H-1	15	82	6.57536	1.16788	15.1784	0.234	31
6H-1	14.99	54	7.47672	1.42639	9.99555	0.234	30.9874
6H-1	14.97	52	7.78674	0.455195	9.62534	0.234	30.9621
5H-2	13.48	114	6.45297	0.509103	42.4379	0.4706	29.0785
5H-2	13.47	27	7.51296	0.565512	10.0511	0.4706	29.0659
5H-2	13.46	43	6.96752	0.776219	16.0073	0.4706	29.0532
5H-2	13.45	24	8.24984	0.615055	8.93429	0.4706	29.0406
5H-1	13.23	181	6.95793	1.16542	67.3795	0.4706	28.7625
5H-1	12.83	63	8.60039	0.397534	24.3595	0.4888	28.2568
5H-1	12.61	57	5.58173	0.468966	52.9116	0.4888	28.141
5H-1	12.21	32	3.85902	1.26938	29.7048	0.4888	27.9303
5H-1	12.01	33	4.98675	0.718264	35.0325	0.559	27.825
4H-2	11.357	41	3.04862	1.37266	17.4091	0.559	26.9653
4H-2	11.157	49	6.7186	0.920675	7.34448	0.2496	26.6323
4H-2	10.957	135	4.83868	0.970368	20.2348	0.2496	26.2992
4H-2	10.757	46	7.97114	1.06652	6.89481	0.2496	25.9662
4H-2	10.557	94	7.41477	1.38467	8.66359	0.1924	25.5487
4H-2	10.357	34	7.55232	1.4884	3.13364	0.1924	25.1312
4H-1	10.119	48	5.28303	0.955569	4.42396	0.1924	24.6343
4H-1	9.919	54	6.9575	2.35207	4.97696	0.1924	24.2168
4H-1	9.724	80	8.39516	1.4293	5.57977	0.1456	23.8098
4H-1	9.572	83	8.21596	2.48005	3.72502	0.1456	23.3166
4H-1	8.777	85	9.60911	1.8029	4.42787	0.169	20.7375
3H-2	7.883	89	12.6149	0.858094	8.47553	0.2288	18.5896
3H-2	7.483	114	14.681	0.363	19.0164	0.2288	18.0409
3H-2	7.283	158	8.975	0.797	151.956	0.3302	17.9723
3H-1	7.073	62	5.461	1.034	59.6283	0.3302	17.9002
3H-1	6.873	102	7.107	2.185	98.0983	0.3302	17.8315
3H-1	6.673	83	7.641	1.718	0	0	17.7628
3H-1	6.473	79	6.322	0.784	5.98252	0	17.6942
3H-1	6.273	79	6.811	1.253	0	0	17.6255
3H-1	5.873	46	8.164	1.474	#REF!	0.026	17.0065
3H-1	5.683	87	3.637	0.972	0.822093	0.026	16.4837
2H-2	5.057	113	8.99	1.99	0.888471	0.026	14.4137
2H-2	4.657	121	9.305	1.47	2.66415	0.0728	13.0911
2H-2	4.457	350	12.984	0.129	18.1666	0.1716	12.4299
2H-2	4.257	236	12.553	0.179	12.2494	0.1716	11.7687
2H-2	4.057	207	15	0.139	9.00217	0.1716	10.9795
2H-1	3.862	370	15.502	0.186	16.0908	0.1716	10.2101
2H-1	3.418	284	18.558	0.187	9.49155	0.1716	7.93034
2H-1	2.882	115	17.292	0.237	0	0	5.17766
2H-1	2.672	377	22.946	0.529	0	0	4.09908
2H-1	2.592	104	16.772	0.687	0	0	3.68832
2H-1	2.392	66	19.432	0.346	7.55215	0.5876	2.66129
2H-1	2.336	199	18.255	0.263	22.7677	0.5876	2.37368
1H-2	1.894	80	4.575	0.255	11.8035	0.5876	0.613393
1H-2	1.694	63	5.947	0.191	113.254	0.5876	0.54802
1H-2	1.494	65	11.845	0.142	115.792	0.5876	0.48205
1H-2	1.294	68	11.326	1.426	121.136	0.5876	0.41608
1H-2	1.094	68	7.809	1.097	63.6728	0.3068	0.35055
1H-2	0.894	65	7.167	0.493	60.8637	0.3068	0.28502
1H-1	0.6	118	11.077	0.256	0	0	0.188595
1H-1	0.4	85	6.818	0.344	0	0	0.123
1H-1	0.2	61	6.495	0.797	41.8127	0.2262	0.057
