# Supplementary material for: Evidence for millennial-scale interactions between Hg cycling and hydroclimate from Lake Bosumtwi, Ghana
Source: Copernicus journal article supplement (doi:10.5194/cp-21-817-2025), 2025-04-17
Supplement: Supplementary file 2 [file cp-21-817-2025-supplement.zip]

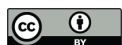

*Supplement of*

**Evidence for millennial-scale interactions between Hg cycling and hydroclimate from Lake Bosumtwi, Ghana**

**Alice R. Paine et al.**

*Correspondence to:* Alice R. Paine ([alice.paine@unibas.ch](mailto:alice.paine@unibas.ch))

- [cp-21-817-2025-supplement-title-page.pdf](#)
- [\(COTP-S3\) BOS04-5B supplementary information.pdf](#)
- [\(COTP-S3\) BOS04-5B\\_supplementary data.xlsx](#)

The copyright of individual parts of the supplement might differ from the article licence.
